# Supplementary material for: Incident Heart Failure Within the First and Fifth Year after Delivery Among Women With Hypertensive Disorders of Pregnancy and Prepregnancy Hypertension in a Diverse Population
Source: PubMed Central journal article supplement — J Am Heart Assoc. 2021 Aug 25;10(17):e021616. doi: 10.1161/JAHA.121.021616 (PMC8649300; doi:10.1161/jaha.121.021616), 2021-08-25
Supplement: JAH3-10-e021616-s001.pdf [file JAH3-10-e021616-s001.pdf]

# **SUPPLEMENTAL MATERIAL**

**Table S1. Hospitalization and emergency department International Classification of Diseases, Ninth and Tenth Revision, Clinical Modification (ICD-9-CM) and (ICD-10-CM) codes or as reported on birth certificates or death certificates for the exposure, covariates, and outcomes of interest**

| DIAGNOSIS                                                                                                                                                                                                                                                                                                                                                                                                                                                                       | ICD-9-CM CODE                                                | ICD-10-CM CODE                    |
|---------------------------------------------------------------------------------------------------------------------------------------------------------------------------------------------------------------------------------------------------------------------------------------------------------------------------------------------------------------------------------------------------------------------------------------------------------------------------------|--------------------------------------------------------------|-----------------------------------|
| Outcome of delivery, birth *                                                                                                                                                                                                                                                                                                                                                                                                                                                    | V27, V30, 640-649, 650-659, 660-669                          | Z37.x                             |
| Single liveborn, single live birth *                                                                                                                                                                                                                                                                                                                                                                                                                                            | V27.0, V30.0                                                 | Z37.0                             |
| Congenital heart disease †                                                                                                                                                                                                                                                                                                                                                                                                                                                      | 745, 745.5, 746, 746.4, 746.8, 746.87, 746.9, 746.93, 746.99 | Q20.x, Q21.x, Q22.x, Q23.x, Q24.x |
| <b>Diabetes:</b>                                                                                                                                                                                                                                                                                                                                                                                                                                                                |                                                              |                                   |
| <b>Maternal/Gestational diabetes</b>                                                                                                                                                                                                                                                                                                                                                                                                                                            | 250.00-250.92, 648.0, 648.8                                  | E10, E11, O24.3, O24.4, O24.9     |
| <b>Pre-pregnancy and Gestational diabetes (birth certificate)</b>                                                                                                                                                                                                                                                                                                                                                                                                               | --                                                           | --                                |
| <b>Heart failure:</b>                                                                                                                                                                                                                                                                                                                                                                                                                                                           |                                                              |                                   |
| <b>Hypertensive heart disease with heart failure; Hypertensive heart and chronic kidney disease with heart failure; Congestive heart failure</b>                                                                                                                                                                                                                                                                                                                                | 402.01, 402.11, 402.91, 404.x1, 404.x3, 428                  | I11.0, I13.0, I13.2, I50.x        |
| <b>Hypertensive disorders of pregnancy (HDP):</b>                                                                                                                                                                                                                                                                                                                                                                                                                               |                                                              |                                   |
| <b>Gestational hypertension; Pre-eclampsia; Eclampsia;</b>                                                                                                                                                                                                                                                                                                                                                                                                                      | 642.3-642.7                                                  | O11, O13-O15                      |
| <b>Pre-existing hypertension with pre-eclampsia;</b>                                                                                                                                                                                                                                                                                                                                                                                                                            | --                                                           | --                                |
| <b>Gestational hypertension (birth certificate)</b>                                                                                                                                                                                                                                                                                                                                                                                                                             | --                                                           | --                                |
| <b>Kidney transplant</b>                                                                                                                                                                                                                                                                                                                                                                                                                                                        | procedure code: 55.6, V42.0                                  | Z94.0                             |
| <b>Peripartum cardiomyopathy</b>                                                                                                                                                                                                                                                                                                                                                                                                                                                | 674.5                                                        | O93.0                             |
| <b>Peripartum death</b>                                                                                                                                                                                                                                                                                                                                                                                                                                                         | --                                                           | O93.0                             |
| <b>Pre-pregnancy hypertension:</b>                                                                                                                                                                                                                                                                                                                                                                                                                                              |                                                              |                                   |
| <b>Benign essential hypertension complicating pregnancy, childbirth, and the puerperium; Hypertension secondary to renal disease complicating pregnancy, childbirth, and the puerperium; Other pre-existing hypertension complicating pregnancy, childbirth, and the puerperium; Pre-existing essential hypertension complicating pregnancy, childbirth, and the puerperium, Pre-existing hypertensive heart disease complicating pregnancy, childbirth and the puerperium.</b> | 642.0-642.2, 642.9                                           | O10, O16                          |
| <b>Pre-pregnancy hypertension (birth certificate)</b>                                                                                                                                                                                                                                                                                                                                                                                                                           | --                                                           | --                                |
| <b>Pre-pregnancy hypertension with superimposed HDP: ‡</b>                                                                                                                                                                                                                                                                                                                                                                                                                      | 642.7                                                        | O11                               |
| <b>Pre-eclampsia or eclampsia superimposed on pre-existing hypertension; Pre-existing hypertension with pre-eclampsia</b>                                                                                                                                                                                                                                                                                                                                                       |                                                              |                                   |

\* Obtained from the mother's hospitalization/emergency department visit record

† Based on Honigberg *et al.* 2019<sup>1</sup>

‡ Also defined by a combination of the above diagnosis codes for hypertensive disorder of pregnancy and pre-pregnancy hypertension.

#### REFERENCES

1. Honigberg MC, Zekavat SM, Aragam K, et al. Long-Term Cardiovascular Risk in Women With Hypertension During Pregnancy. *J Am Coll Cardiol.* 2019;74(22):2743-2754.

**Table S2. Data source(s) and completion of variables included in the models**

| Characteristic                                   | Data source(s)                                              | Total<br>N=425,649          | Non-Hispanic<br>White (NHW)<br>N=250,506 | Non-Hispanic<br>Black (NHB)<br>N=134,220 | Hispanic<br>N=40,923 |
|--------------------------------------------------|-------------------------------------------------------------|-----------------------------|------------------------------------------|------------------------------------------|----------------------|
|                                                  |                                                             | Proportion of complete data |                                          |                                          |                      |
| <b>Sociodemographic</b>                          |                                                             |                             |                                          |                                          |                      |
| Age (maternal)                                   | Birth certificate and/or hospitalization                    | 100%                        | 100%                                     | 100%                                     | 100%                 |
| Education                                        | Birth certificate                                           | 100%                        | 100%                                     | 100%                                     | 100%                 |
| Median household income per year                 | Hospitalization/ED visit encounter                          | 97.9%                       | 97.6%                                    | 98.9%                                    | 96.5%                |
| Payer during pregnancy                           | Birth certificate                                           | 99.3%                       | 99.4%                                    | 99.3%                                    | 98.2%                |
| Race/ethnicity                                   | Birth certificate and/or hospitalization/ED visit encounter | 100%                        | 100%                                     | 100%                                     | 100%                 |
| Rural/urban residence                            | Hospitalization/ED visit encounter                          | 100%                        | 100%                                     | 100%                                     | 100%                 |
| WIC eligibility during pregnancy                 | Birth certificate                                           | 98.5%                       | 98.6%                                    | 98.5%                                    | 98.0%                |
| <b>Behavioral</b>                                |                                                             |                             |                                          |                                          |                      |
| Smoking during pregnancy                         | Birth certificate                                           | >99.9%                      | >99.9%                                   | >99.9%                                   | >99.9%               |
| <b>Clinical</b>                                  |                                                             |                             |                                          |                                          |                      |
| Change in BMI after delivery *                   | Birth certificate                                           | 99.6%                       | 99.7%                                    | 99.5%                                    | 99.3%                |
| Gestational age at delivery                      | Birth certificate                                           | 99.9%                       | >99.9%                                   | 99.9%                                    | 99.9%                |
| Pre-pregnancy or gestational diabetes            | Birth certificate and/or hospitalization/ED visit encounter | 100%                        | 100%                                     | 100%                                     | 100%                 |
| Induced labor                                    | Birth certificate                                           | 100%                        | 100%                                     | 100%                                     | 100%                 |
| Mode of delivery                                 | Birth certificate                                           | >99.9%                      | >99.9%                                   | >99.9%                                   | >99.9%               |
| Number of pregnancies prior to index pregnancy   | Birth certificate                                           | 100%                        | 100%                                     | 100%                                     | 100%                 |
| Pre-pregnancy BMI                                | Birth certificate                                           | 100%                        | 100%                                     | 100%                                     | 100%                 |
| Previous cesarean section <sup>b†</sup>          | Birth certificate                                           | 100%                        | 100%                                     | 100%                                     | 100%                 |
| Previous pre-term delivery                       | Birth certificate                                           | 100%                        | 100%                                     | 100%                                     | 100%                 |
| Prenatal care, measured by R-GINDEX <sup>‡</sup> | Birth certificate                                           | 71.6%                       | 77.3%                                    | 66.2%                                    | 54.5%                |

BMI, body mass index; ED, emergency department; R-GINDEX, Revised-Graduated Prenatal Care Utilization Index; WIC, Women, Infants, and Children.

\* BMI at delivery was missing for 0.4% of women.

<sup>†</sup> Previous cesarean section was reported as unknown on the birth certificate for 53.4% of women. These women were included in the model by including an unknown category for this variable.

<sup>‡</sup> R-GINDEX was not able to be calculated due to missing information for 28.4% of women. These women were included in the model by including a missing category for this variable.

**Table S3. Race/ethnic-specific adjusted hazard ratios for fatal and non-fatal heart failure (HF) within 5 years of delivery among women with hypertensive disorders of pregnancy (HDP) and/or pre-pregnancy hypertension (HTN) by exposure group, 2004-2017 \***

| Incident HF ≤5 years              | Non-Hispanic White |                          |                     | Non-Hispanic Black |                          |                     |
|-----------------------------------|--------------------|--------------------------|---------------------|--------------------|--------------------------|---------------------|
|                                   | Event              | Event Rate<br>(95% CI) † | HR<br>(95% CI) ‡    | Event              | Event Rate<br>(95% CI) † | HR<br>(95% CI) ‡    |
| Neither pre-pregnancy HTN nor HDP | 189                | 0.18<br>(0.16-0.21)      | referent            | 244                | 0.48<br>(0.42-0.54)      | referent            |
| Pre-pregnancy HTN                 | <5                 | 0.85<br>(0.27-2.64)      | 3.16<br>(1.00-9.95) | <5                 | 0.84<br>(0.27-2.61)      | 1.11<br>(0.36-3.49) |
| HDP                               | 176                | 0.96<br>(0.83-1.11)      | 4.14<br>(3.31-5.17) | 293                | 2.28<br>(2.03-2.56)      | 3.74<br>(3.12-4.49) |
| Both pre-pregnancy HTN and HDP    | 25                 | 1.22<br>(0.82-1.80)      | 4.11<br>(2.64-6.40) | 104                | 4.30<br>(3.55-5.22)      | 4.88<br>(3.78-6.29) |

Abbreviations: CI, confidence interval; HDP, hypertensive disorder of pregnancy; HF, heart failure; HR, hazard ratio; HTN, hypertension.

\*  $p$ -value=0.3452 for interaction between HDP and pre-pregnancy hypertension and race-ethnic group.

† Per 1,000 person-years.

‡ Adjusted for sociodemographic (maternal age, education, rural/urban residence, median income, payer, Women, Infants, and Children [WIC]), behavioral (smoking during pregnancy), and clinical characteristics (pre-pregnancy body mass index [BMI], change in BMI after delivery, pre-pregnancy or gestational diabetes, gestational age at delivery, mode of delivery, induced labor, number of pregnancies prior to index pregnancy, previous cesarean section, previous pre-term delivery, Revised-Graduated Prenatal Care Utilization Index [R-GINDEX]).

**Table S4. Demographic and clinical characteristics of mothers at index pregnancy in South Carolina by race/ethnic group, 2004-2016<sup>\*, †, ‡</sup>**

| Characteristic                                      | Non-Hispanic White |                         | Non-Hispanic Black |                         | Hispanic       |                         | p-value <sup>§</sup> |
|-----------------------------------------------------|--------------------|-------------------------|--------------------|-------------------------|----------------|-------------------------|----------------------|
|                                                     | N=250,506 (58.9)   |                         | N=134,220 (31.5)   |                         | N=40,923 (9.6) |                         |                      |
|                                                     | <i>n</i> (%)       | <i>mean</i> ± <i>SD</i> | <i>n</i> (%)       | <i>mean</i> ± <i>SD</i> | <i>n</i> (%)   | <i>mean</i> ± <i>SD</i> |                      |
| Neither pre-preg HTN nor HDP                        | 208,794            | (83.3)                  | 102,676            | (76.5)                  | 36,460         | (89.1)                  | <0.0001              |
| Pre-pregnancy HTN                                   | 708                | (0.3)                   | 715                | (0.5)                   | 107            | (0.3)                   |                      |
| HDP                                                 | 36,873             | (14.7)                  | 25,924             | (19.3)                  | 4036           | (9.9)                   |                      |
| Both pre-preg HTN and HDP                           | 4,131              | (1.6)                   | 4,905              | (3.7)                   | 320            | (0.8)                   |                      |
| Maternal age at delivery, y                         | 27.9               | ±5.9                    | 25.9               | ±6.0                    | 27.1           | ±6.0                    | <0.0001              |
| <20                                                 | 19,367             | (7.7)                   | 19,017             | (14.2)                  | 4,283          | (10.5)                  | <0.0001              |
| 20-24                                               | 57,940             | (23.1)                  | 44,201             | (32.9)                  | 10,978         | (26.8)                  |                      |
| 25-29                                               | 74,010             | (29.5)                  | 35,091             | (26.1)                  | 11,887         | (29.0)                  |                      |
| 30-34                                               | 63,121             | (25.2)                  | 22,539             | (16.8)                  | 8,578          | (21.0)                  |                      |
| 35-39                                               | 29,641             | (11.8)                  | 10,711             | (8.0)                   | 4,208          | (10.3)                  |                      |
| 40+                                                 | 6,427              | (2.6)                   | 2,661              | (2.0)                   | 989            | (2.4)                   |                      |
| Education                                           |                    |                         |                    |                         |                |                         |                      |
| Less than HS                                        | 29,360             | (11.7)                  | 25,058             | (18.7)                  | 22,412         | (54.8)                  | <0.0001              |
| HS graduate                                         | 54,521             | (21.8)                  | 41,815             | (31.2)                  | 8,216          | (20.1)                  |                      |
| Some college                                        | 61,958             | (24.7)                  | 41,411             | (30.9)                  | 5,142          | (12.6)                  |                      |
| ≥College graduate                                   | 104,667            | (41.8)                  | 25,936             | (19.3)                  | 5,153          | (12.6)                  |                      |
| Urban/rural (based on RUCA by zipcode of residence) |                    |                         |                    |                         |                |                         |                      |
| Urban                                               | 194,763            | (77.7)                  | 89,007             | (66.3)                  | 29,985         | (73.3)                  | <0.0001              |
| Rural                                               | 55,743             | (22.3)                  | 45,213             | (33.7)                  | 10,938         | (26.7)                  |                      |
| Annual household income                             |                    |                         |                    |                         |                |                         |                      |
| <\$36,000                                           | 45,936             | (18.3)                  | 59,624             | (44.4)                  | 9,672          | (23.6)                  | <0.0001              |
| \$36,000 to <\$54,000                               | 128,925            | (51.5)                  | 52,323             | (39.0)                  | 19,525         | (47.7)                  |                      |
| ≥\$54,000                                           | 69,622             | (27.8)                  | 20,754             | (15.5)                  | 10,276         | (25.1)                  |                      |
| Primary payer during pregnancy                      |                    |                         |                    |                         |                |                         |                      |
| Medicaid                                            | 94,941             | (37.9)                  | 92,495             | (68.9)                  | 17,528         | (42.8)                  | <0.0001              |
| Private                                             | 130,673            | (52.2)                  | 33,230             | (24.8)                  | 6,039          | (14.8)                  |                      |
| Self-pay                                            | 6,446              | (2.6)                   | 2,386              | (1.8)                   | 13,733         | (33.6)                  |                      |
| Other                                               | 16,950             | (6.8)                   | 5,166              | (3.8)                   | 2,880          | (7.0)                   |                      |
| WIC eligibility during pregnancy                    | 92,516             | (36.9)                  | 99,691             | (74.3)                  | 26,318         | (64.3)                  | <0.0001              |
| Pre-pregnancy smoking                               | 50,144             | (20.0)                  | 12,863             | (9.6)                   | 1,548          | (3.8)                   | <0.0001              |
| Smoking during pregnancy                            | 38,989             | (15.6)                  | 9,485              | (7.1)                   | 930            | (2.3)                   | <0.0001              |
| Pre-pregnancy BMI (kg/m <sup>2</sup> )              | 26.3               | ±6.4                    | 29.1               | ±7.4                    | 26.7           | ±5.5                    | <0.0001              |
| Change in BMI at delivery                           | 5.2                | ±2.8                    | 4.3                | ±3.2                    | 4.6            | ±2.9                    | <0.0001              |
| Gestational age at delivery                         | 38.6               | ±1.8                    | 38.2               | ±2.3                    | 38.7           | ±1.8                    | <0.0001              |
| <28 weeks                                           | 761                | (0.3)                   | 1,418              | (1.1)                   | 145            | (0.4)                   | <0.0001              |
| 28 to <34 weeks                                     | 3,607              | (1.4)                   | 4,012              | (3.0)                   | 552            | (1.3)                   |                      |
| 34 to <37 weeks                                     | 15,897             | (6.3)                   | 10,881             | (8.1)                   | 2,337          | (5.7)                   |                      |
| ≥37 weeks                                           | 230,125            | (91.9)                  | 117,808            | (87.8)                  | 37,861         | (92.5)                  |                      |
| Mode of delivery                                    |                    |                         |                    |                         |                |                         |                      |
| Cesarean section                                    | 84,855             | (33.9)                  | 47,986             | (35.8)                  | 12,009         | (29.3)                  | <0.0001              |
| Vaginal                                             | 165,644            | (66.1)                  | 86,230             | (64.2)                  | 28,913         | (70.7)                  |                      |
| Induced labor                                       | 39,640             | (15.8)                  | 18,470             | (13.8)                  | 4,149          | (10.1)                  | <0.0001              |
| No. of pregnancies prior to index pregnancy         | 0.7                | ±1.0                    | 0.9                | ±1.1                    | 1.1            | ±1.2                    | <0.0001              |
| Previous cesarean section                           |                    |                         |                    |                         |                |                         |                      |
| Yes                                                 | 12,869             | (5.1)                   | 7,953              | (5.9)                   | 2,740          | (6.7)                   | <0.0001              |
| No                                                  | 104,415            | (41.7)                  | 54,585             | (40.7)                  | 15,670         | (38.3)                  |                      |
| Unknown                                             | 133,222            | (53.2)                  | 71,682             | (53.4)                  | 22,513         | (55.0)                  |                      |

| Characteristic                        | Non-Hispanic White                          | Non-Hispanic Black                          | Hispanic                                  | p-value <sup>§</sup> |
|---------------------------------------|---------------------------------------------|---------------------------------------------|-------------------------------------------|----------------------|
|                                       | N=250,506 (58.9)<br><i>n (%)</i> , mean ±SD | N=134,220 (31.5)<br><i>n (%)</i> , mean ±SD | N=40,923 (9.6)<br><i>n (%)</i> , mean ±SD |                      |
| Previous preterm birth                | 5,429 (2.2)                                 | 4,746 (3.5)                                 | 941 (2.3)                                 | <0.0001              |
| Prenatal care, measured by R-GINDEX   |                                             |                                             |                                           |                      |
| Inadequate                            | 45,720 (18.3)                               | 21,562 (16.1)                               | 7,629 (18.6)                              | <0.0001              |
| Intermediate                          | 65,365 (26.1)                               | 24,741 (18.4)                               | 6,207 (15.2)                              |                      |
| Adequate                              | 4,385 (1.8)                                 | 2,118 (1.6)                                 | 409 (1.0)                                 |                      |
| Intensive                             | 76,850 (30.7)                               | 38,912 (29.0)                               | 7,178 (17.5)                              |                      |
| No care                               | 1,285 (0.5)                                 | 1,481 (1.1)                                 | 884 (2.2)                                 |                      |
| Missing                               | 56,901 (22.7)                               | 45,406 (33.8)                               | 18,616 (45.5)                             |                      |
| Pre-pregnancy or gestational diabetes | 15,596 (6.2)                                | 9,486 (7.1)                                 | 2,917 (7.1)                               | <0.0001              |

Abbreviations: BMI, body mass index; HDP, Hypertensive disorders of pregnancy; HS, high school; HTN, hypertension; no., number; pre-preg, pre-pregnancy; R-GINDEX, Revised-Graduated Prenatal Care Utilization Index; RUCA, Rural-Urban Commuting Area; SD, standard deviation; WIC, Women, Infants, and Children; y, years.

\* Data includes person-level diagnostic codes at time of discharge or birth certificate. Hypertensive disorders of pregnancy (HDP) were defined as pre-eclampsia, eclampsia, or gestational hypertension (ICD-9/10-CM: 642.3-642.7; O11, O13-O15) or based on hospitalization/emergency department (ED) visit data, or gestational hypertension as reported on the birth certificate. Pre-pregnancy hypertension was based on hospitalization/ED visit data (ICD-9/10-CM: 642.0-642.2, 642.9; O10, O16) or birth certificates. Pre-pregnancy hypertension with superimposed HDP was based on hospitalization/ED visit data (ICD-9/10-CM: 642.7; O11) or a combination of the above diagnosis codes for HDP and pre-pregnancy hypertension.

† Pre-pregnancy diabetes, gestational diabetes, pre-pregnancy BMI, BMI at delivery, pre-pregnancy smoking, smoking during pregnancy, and primary payer during pregnancy were available from the birth certificate.

‡ Variables with >0.1% missing data included: annual household income, n=8,992; prenatal care as measured by R-GINDEX, n=120,923; primary payer, n=3,182; and WIC eligibility in pregnancy, n=6,449.

§ Characteristics are compared by race/ethnic group using p-values calculated by chi-square tests for categorical variables and analysis of variance (ANOVA) for continuous variables.
